# Supplementary material for: Hybrid Nanostructured Compounds of Mo2C on Vertical Graphene Nanoflakes for a Highly Efficient Hydrogen Evolution Reaction
Source: PubMed Central journal article supplement (PMC10265661; doi:10.1021/acsaem.3c00625), 2023-05-19
Supplement: ae3c00625_si_001.pdf [file ae3c00625_si_001.pdf]

# Supporting Information

## Hybrid nanostructured compounds of Mo<sub>2</sub>C on vertical graphene nanoflakes for a highly efficient hydrogen evolution reaction.

Stefanos Chaitoglou<sup>1,2\*</sup>, Roger Amade<sup>1,2</sup>, Rogelio Ospina<sup>3</sup>, Enric Bertran-Serra<sup>1,2</sup>

\*Corresponding Author: Dr. Stefanos Chaitoglou

Contact email: [stefanoschaitoglou@ub.edu](mailto:stefanoschaitoglou@ub.edu)

1. Department of Applied Physics, University of Barcelona, C/Martí i Franquès, 1, 08028

Barcelona, Catalunya, Spain

2. ENPHOCAMAT Group, Institute of Nanoscience and Nanotechnology (IN2UB),

Universitat de Barcelona, C/Martí i Franquès, 1, 08028 Barcelona, Catalunya, Spain

3. Escuela de Física, Universidad Industrial de Santander, Carrera 27 calle 9 Ciudad

Universitaria Bucaramanga, Colombia

Supplementary figures

|                                                                              |    |
|------------------------------------------------------------------------------|----|
| 1. JCPDS patterns of graphite, MoO <sub>2</sub> and α-Mo <sub>2</sub> C..... | S2 |
| 2. Linear sweep voltammetry curves of Mo on GNWs/Papyex ®.....               | S5 |
| 3. Digital images of nanostructured electrodes.....                          | S6 |
| 4. EDS mapping and SEM images of Mo <sub>2</sub> C/ GNWs compounds .....     | S7 |
| 5. Raman spectra of bare GNWs prior and after annealing.....                 | S8 |
| 6. SEM Images and Raman spectra of Mo carbides on GNWs.....                  | S9 |

|                                                                                               |     |
|-----------------------------------------------------------------------------------------------|-----|
| 7. TEM image of Mo <sub>2</sub> C particle.....                                               | S10 |
| 8. XPS graph of C <sub>1s</sub> peak of GNWs/ Papyex ® before and after Mo deposition.....    | S11 |
| 9. Deconvolution of C <sub>1s</sub> peak of of GNWs/ Papyex ® before and after carburization. | S12 |
| 10. XPS graph of Mo <sub>3d</sub> peak before carburization .....                             | S13 |
| 11. XPS graph of Mo <sub>3d</sub> peak under varying carburization duration.....              | S14 |
| 12. Chronoamperometry test and electrode characterization.....                                | S15 |
| 13. Raman spectrum of Mo <sub>2</sub> C onn Papyex ®.....                                     | S16 |
| 14. SEM image of Mo <sub>2</sub> C on Papyex ©.....                                           | S17 |
| 15. CV graphs of Mo <sub>2</sub> C compounds.....                                             | S18 |
| 16. CV graphs and current desity-scan rate plots of bare GNWs .....                           | S1  |

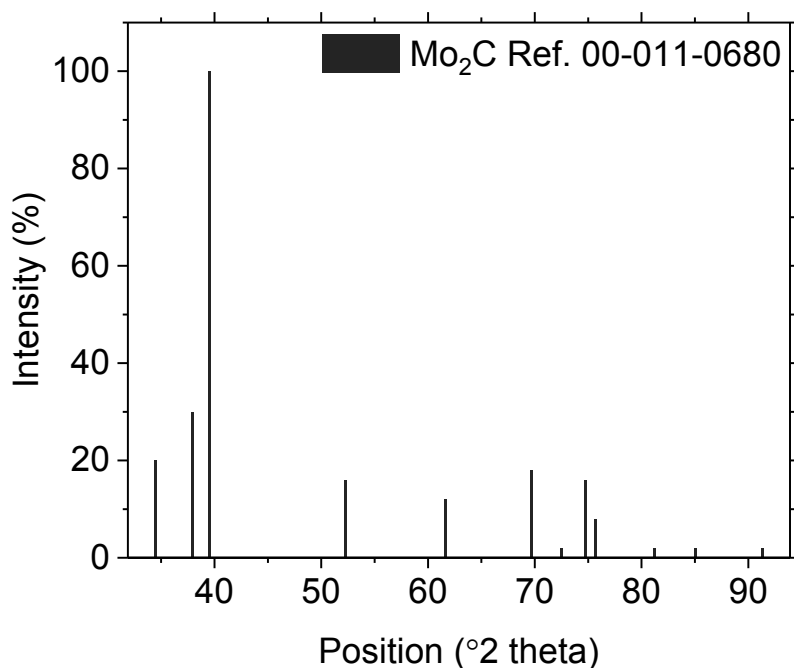

### Peak list Mo<sub>2</sub>C

| No. | h | k | l | d [Å]   | 2Theta [deg] | I [%] |
|-----|---|---|---|---------|--------------|-------|
| 1   | 1 | 0 | 0 | 2.60000 | 34.467       | 20.0  |
| 2   | 0 | 0 | 2 | 2.37000 | 37.934       | 30.0  |
| 3   | 1 | 0 | 1 | 2.28000 | 39.492       | 100.0 |
| 4   | 1 | 0 | 2 | 1.75000 | 52.230       | 16.0  |

|    |   |   |   |         |         |      |
|----|---|---|---|---------|---------|------|
| 5  | 1 | 1 | 0 | 1.50300 | 61.662  | 12.0 |
| 6  | 1 | 0 | 3 | 1.34900 | 69.642  | 18.0 |
| 7  | 2 | 0 | 0 | 1.30300 | 72.481  | 2.0  |
| 8  | 1 | 1 | 2 | 1.26900 | 74.748  | 16.0 |
| 9  | 2 | 0 | 1 | 1.25500 | 75.727  | 8.0  |
| 10 | 0 | 0 | 4 | 1.18300 | 81.255  | 2.0  |
| 11 | 2 | 0 | 2 | 1.14000 | 85.017  | 2.0  |
| 12 | 1 | 0 | 4 | 1.07700 | 91.324  | 2.0  |
| 13 | 2 | 0 | 3 | 1.00300 | 100.349 | 2.0  |
| 14 | 2 | 1 | 0 | 0.98400 | 103.040 | 2.0  |
| 15 | 2 | 1 | 1 | 0.96400 | 106.082 | 4.0  |
| 16 | 1 | 1 | 4 | 0.93000 | 111.845 | 4.0  |
| 17 | 2 | 1 | 2 | 0.90800 | 116.065 | 2.0  |
| 18 | 1 | 0 | 5 | 0.89000 | 119.881 | 2.0  |
| 19 | 2 | 0 | 4 | 0.87500 | 123.367 | 2.0  |
| 20 | 3 | 0 | 0 | 0.86800 | 125.107 | 2.0  |
| 21 | 2 | 1 | 3 | 0.83500 | 134.593 | 4.0  |
| 22 | 3 | 0 | 2 | 0.81500 | 141.872 | 2.0  |

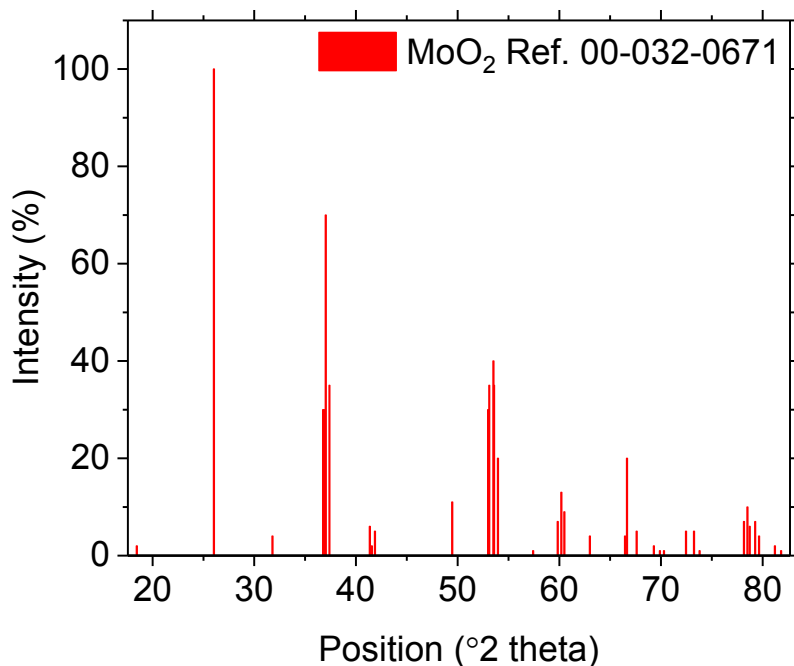

### Peak list MoO<sub>2</sub>

| No. | h  | k | l | d [Å]   | 2Theta [deg] | I [%] |
|-----|----|---|---|---------|--------------|-------|
| 1   | -1 | 0 | 1 | 4.80500 | 18.450       | 2.0   |
| 2   | -1 | 1 | 1 | 3.42000 | 26.033       | 100.0 |
| 3   | 1  | 0 | 1 | 2.81300 | 31.785       | 4.0   |
| 4   | 2  | 0 | 0 | 2.44200 | 36.775       | 30.0  |
| 5   | 1  | 1 | 1 | 2.43700 | 36.853       | 30.0  |
| 6   | -2 | 1 | 1 | 2.42600 | 37.026       | 70.0  |
| 7   | -2 | 0 | 2 | 2.40300 | 37.393       | 35.0  |
| 8   | 2  | 1 | 0 | 2.18100 | 41.365       | 6.0   |

|    |    |   |   |         |        |      |
|----|----|---|---|---------|--------|------|
| 9  | 0  | 2 | 1 | 2.17100 | 41.564 | 2.0  |
| 10 | -2 | 1 | 2 | 2.15600 | 41.867 | 5.0  |
| 11 | -3 | 0 | 1 | 1.84100 | 49.469 | 11.0 |
| 12 | 2  | 1 | 1 | 1.72500 | 53.045 | 30.0 |
| 13 | -2 | 2 | 0 | 1.72300 | 53.112 | 35.0 |
| 14 | -3 | 1 | 2 | 1.71100 | 53.514 | 40.0 |
| 15 | -2 | 2 | 2 | 1.70900 | 53.581 | 35.0 |
| 16 | -2 | 1 | 3 | 1.69760 | 53.970 | 20.0 |
| 17 | -3 | 0 | 3 | 1.60330 | 57.429 | 1.0  |
| 18 | -3 | 1 | 0 | 1.54430 | 59.842 | 7.0  |
| 19 | 0  | 3 | 1 | 1.53600 | 60.198 | 13.0 |
| 20 | 0  | 1 | 3 | 1.52720 | 60.581 | 9.0  |
| 21 | -3 | 2 | 1 | 1.46760 | 63.319 | 4.0  |
| 22 | 2  | 0 | 2 | 1.40570 | 66.458 | 4.0  |
| 23 | -4 | 0 | 2 | 1.40190 | 66.661 | 20.0 |
| 24 | -2 | 0 | 4 | 1.38450 | 67.611 | 5.0  |
| 25 | 3  | 0 | 1 | 1.35480 | 69.301 | 2.0  |
| 26 | 0  | 3 | 2 | 1.34480 | 69.891 | 1.0  |
| 27 | -3 | 2 | 3 | 1.33810 | 70.293 | 1.0  |
| 28 | -4 | 1 | 1 | 1.30330 | 72.461 | 5.0  |
| 29 | -4 | 1 | 3 | 1.29120 | 73.250 | 5.0  |
| 30 | -3 | 1 | 4 | 1.28290 | 73.802 | 1.0  |
| 31 | 4  | 0 | 0 | 1.22190 | 78.161 | 7.0  |
| 32 | 2  | 3 | 1 | 1.21750 | 78.498 | 10.0 |
| 33 | 1  | 3 | 2 | 1.21460 | 78.721 | 6.0  |
| 34 | -2 | 3 | 3 | 1.20760 | 79.267 | 7.0  |
| 35 | -2 | 2 | 4 | 1.20280 | 79.647 | 4.0  |
| 36 | 3  | 2 | 1 | 1.18370 | 81.197 | 2.0  |
| 37 | 1  | 2 | 3 | 1.17640 | 81.808 | 1.0  |
| 38 | -3 | 3 | 0 | 1.14850 | 84.242 | 2.0  |
| 39 | 0  | 3 | 3 | 1.14140 | 84.889 | 4.0  |

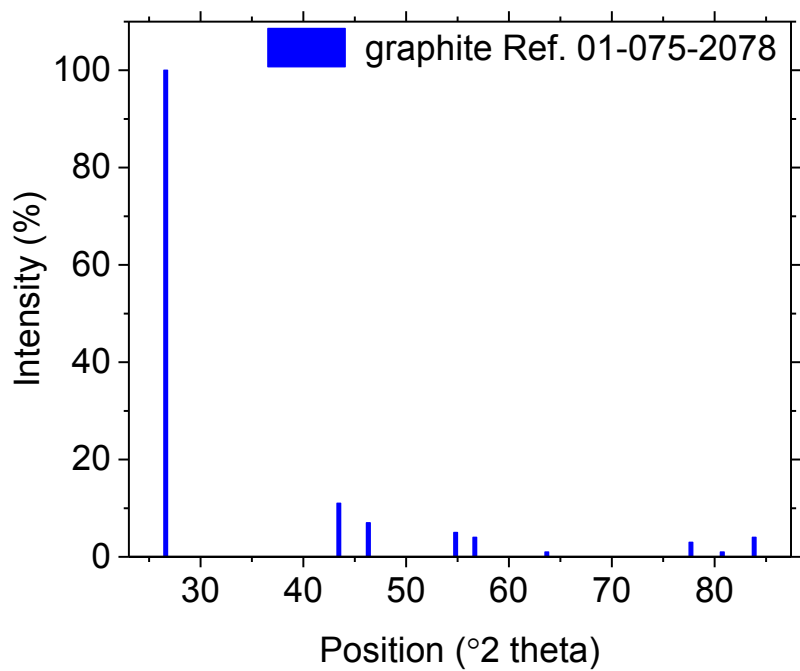

**Peak list graphite**

| No. | h  | k | l | d [Å]   | 2Theta [deg] | I [%] |
|-----|----|---|---|---------|--------------|-------|
| 1   | 1  | 1 | 1 | 3.34701 | 26.611       | 100.0 |
| 2   | 0  | 1 | 0 | 2.08083 | 43.455       | 11.3  |
| 3   | 1  | 1 | 0 | 1.95849 | 46.322       | 7.2   |
| 4   | 2  | 2 | 2 | 1.67351 | 54.812       | 5.0   |
| 5   | 1  | 1 | 2 | 1.62279 | 56.677       | 4.0   |
| 6   | 2  | 2 | 1 | 1.46021 | 63.677       | 1.4   |
| 7   | -1 | 1 | 0 | 1.22803 | 77.697       | 3.2   |
| 8   | 2  | 3 | 2 | 1.18926 | 80.739       | 1.0   |
| 9   | 1  | 2 | 0 | 1.15288 | 83.849       | 4.9   |
| 10  | 3  | 3 | 3 | 1.11567 | 87.329       | 0.7   |

Figure S1: Data of the JCPDS patterns of graphite (bottom), MoO<sub>2</sub> (middle) and a-Mo<sub>2</sub>C (top).

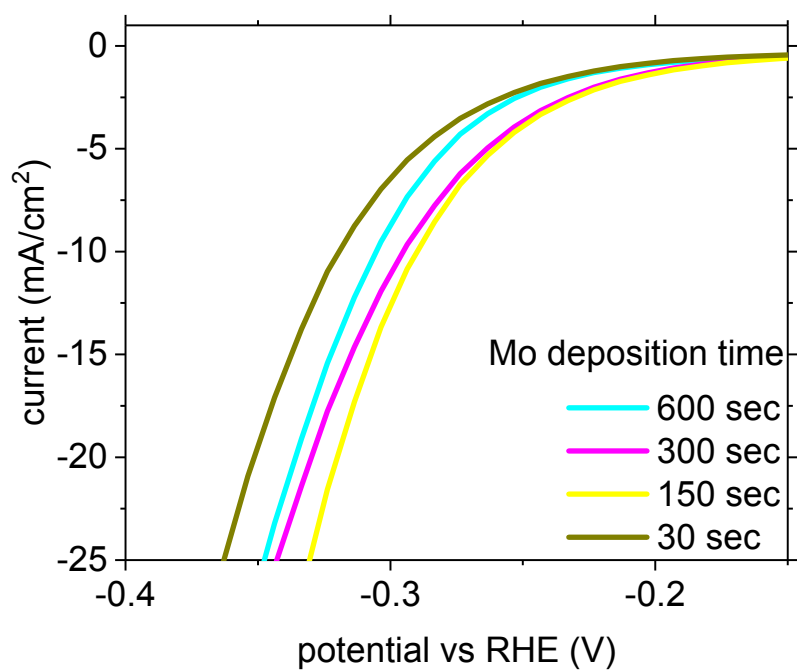

Figure S2: Linear sweep voltammetry curves of Mo deposited on GNWs/ Papyex ®, under various deposition times

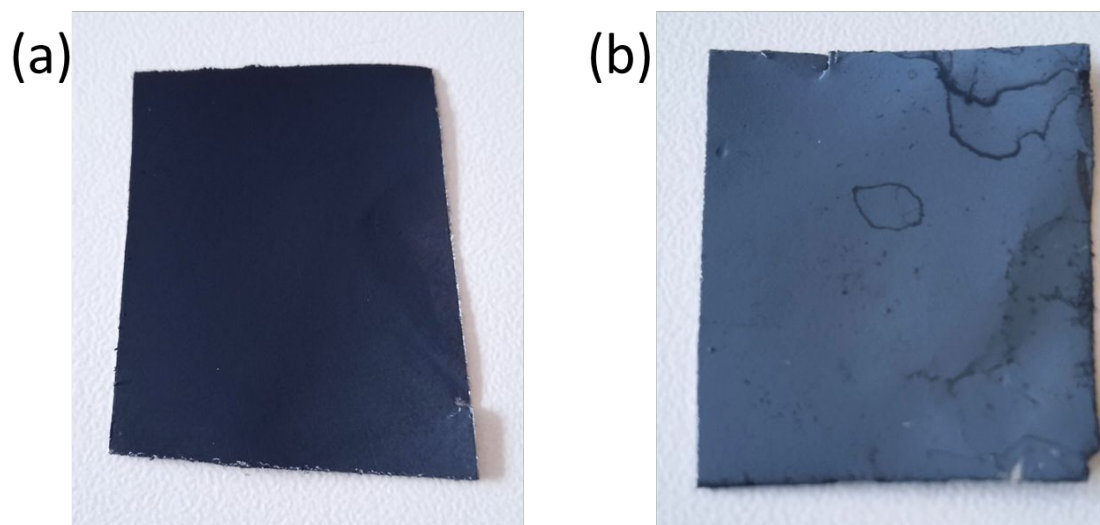

Figure S3: Digital image of a) GNWs on Papyex electrode and b) nanostructured Mo<sub>2</sub>C on GNWs electrode.

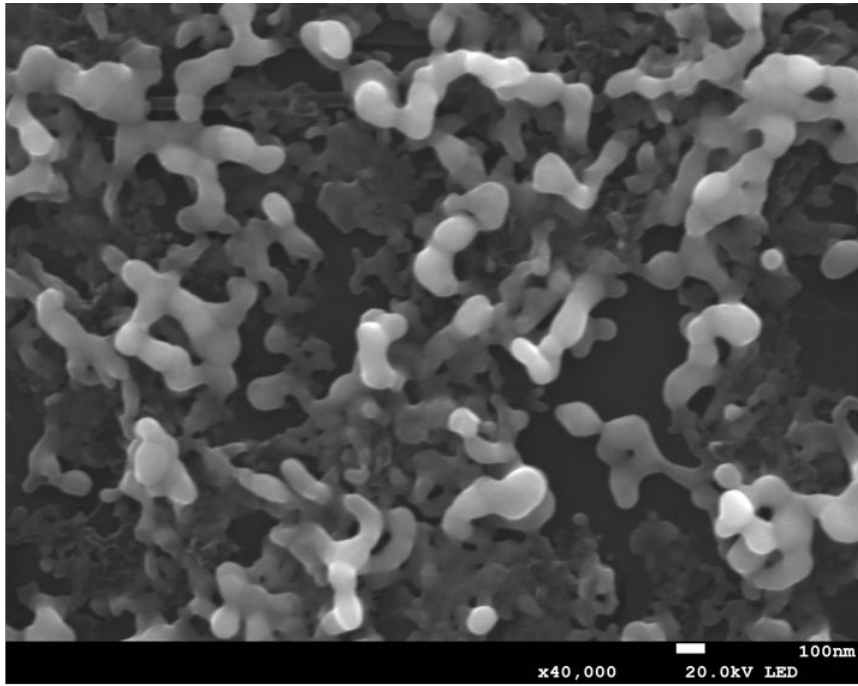

Mo L $\alpha$ 1

C K $\alpha$ 1\_2

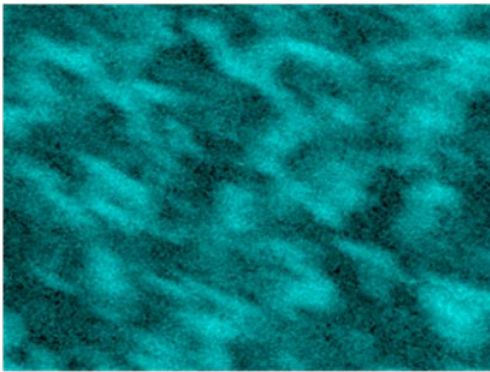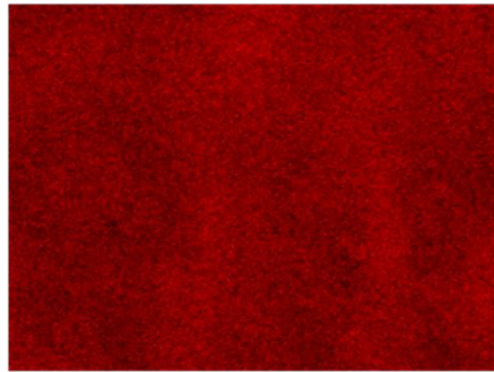



Figure S4: Mo and C EDS mapping and SEM image of Mo<sub>2</sub>C/GNWs prepared after 15 min of annealing times.

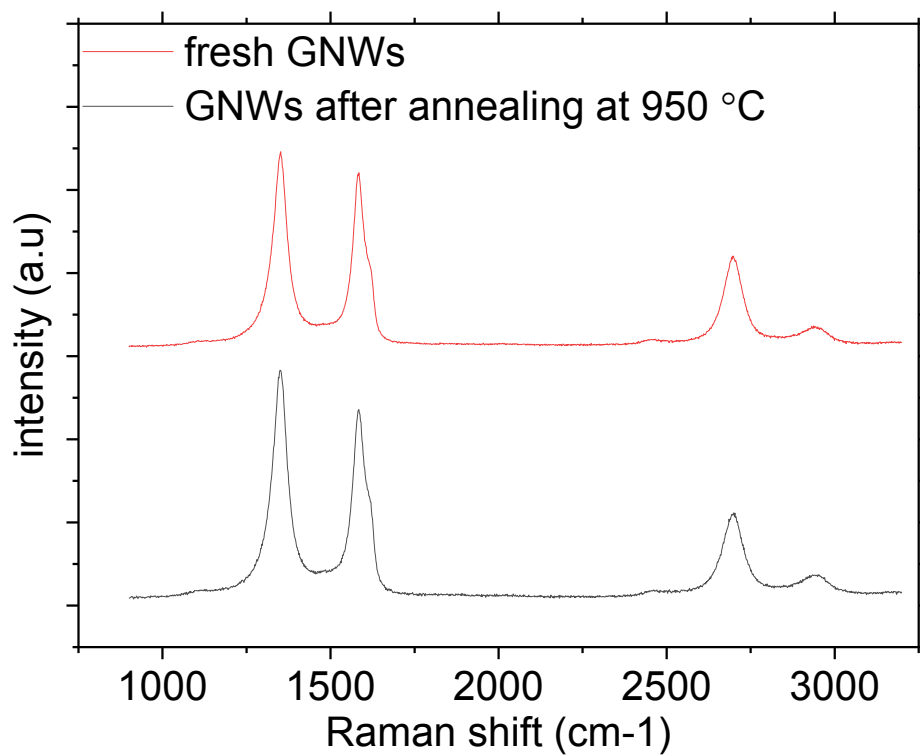

Figure S5: Raman spectra of bare GNWs, fresh (red line) and after thermal annealing at 950 °C (black line) in Ar atmosphere, showing lack of any structural alteration.

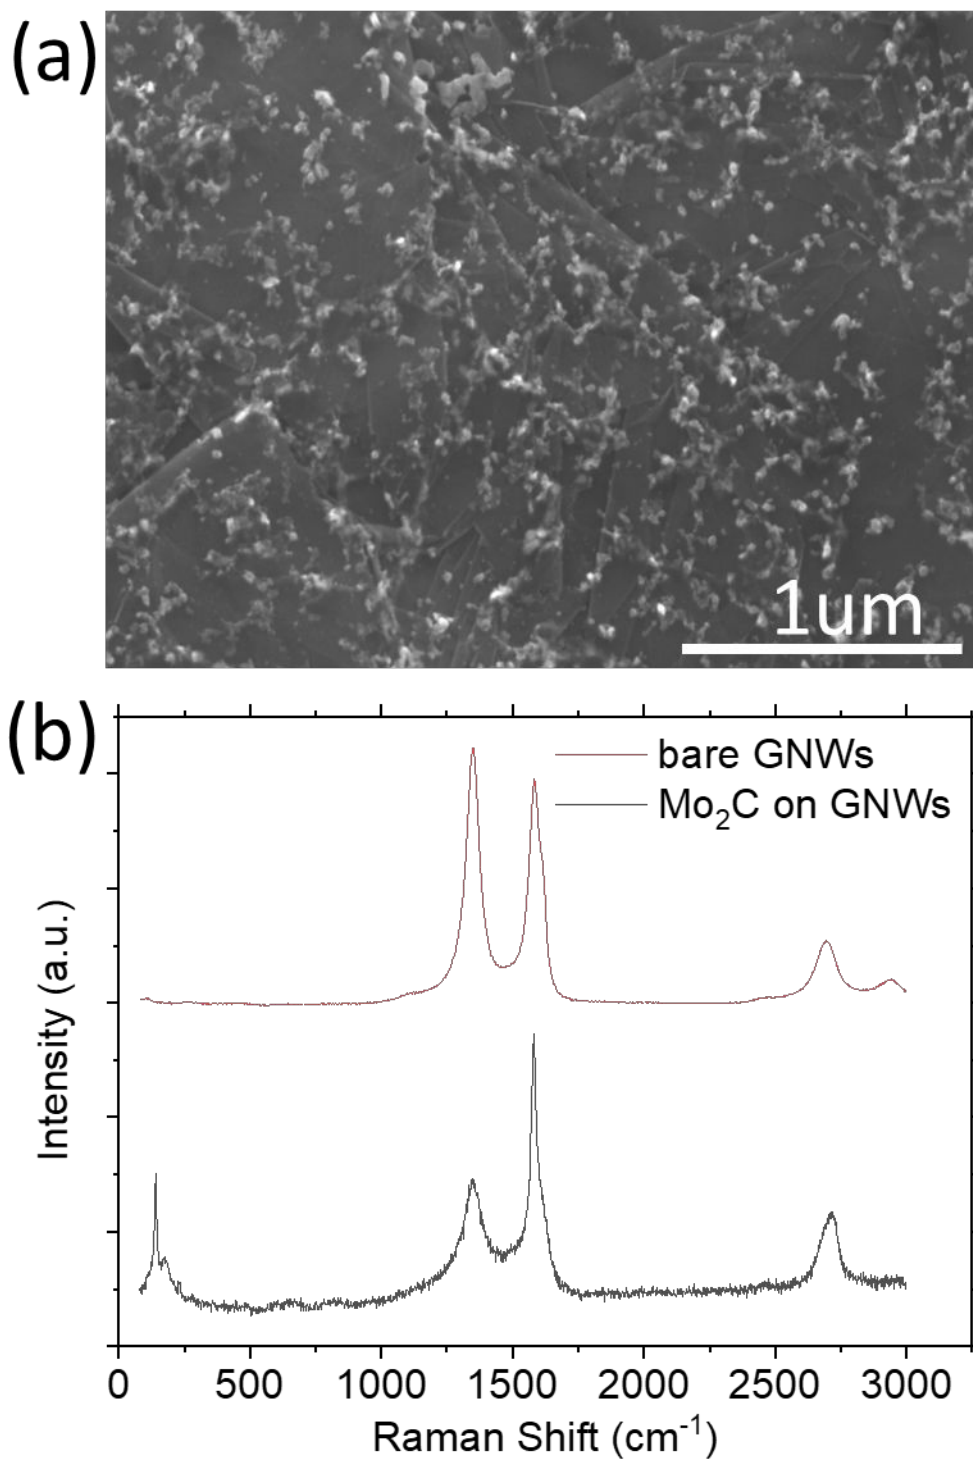

Figure S6: a) SEM image of  $\text{Mo}_2\text{C}$  deposited on GNWs/Papyex ©, after carburization in  $\text{CH}_4$  atmosphere. Partial etching of the GNWs is observed. b) Raman spectra of the sample before

and after Mo<sub>2</sub>C deposition reveal the deterioration in the crystal quality of the GNWs, as a result of the carburization process in CH<sub>4</sub> atmosphere.

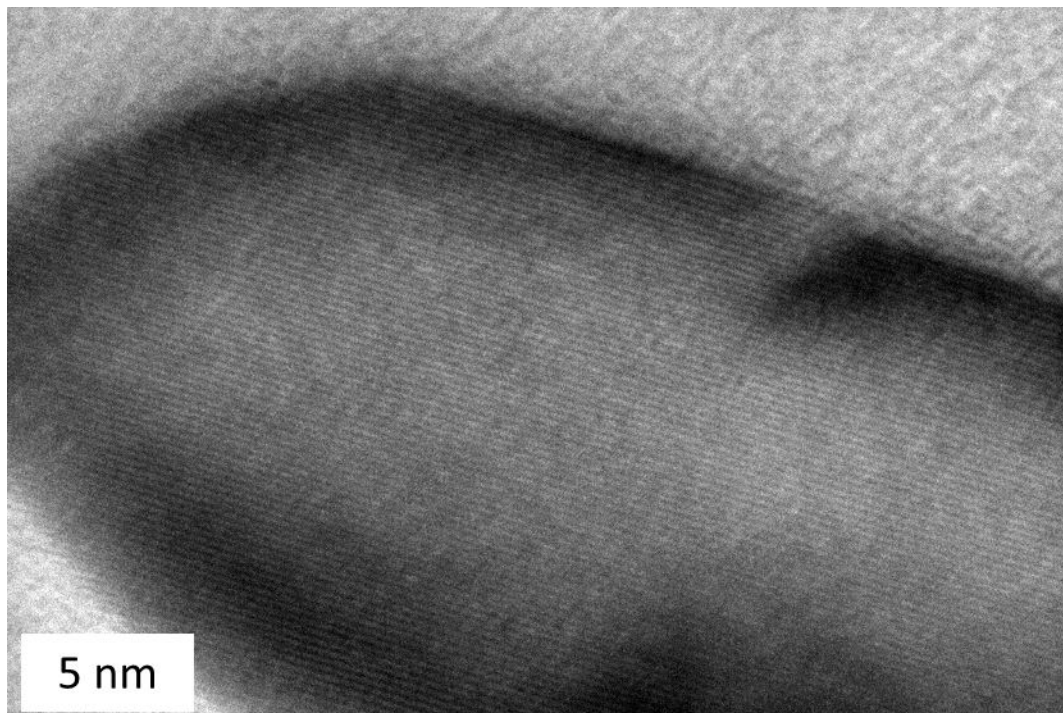

Figure S7: TEM image of a single crystal Mo<sub>2</sub>C particle.

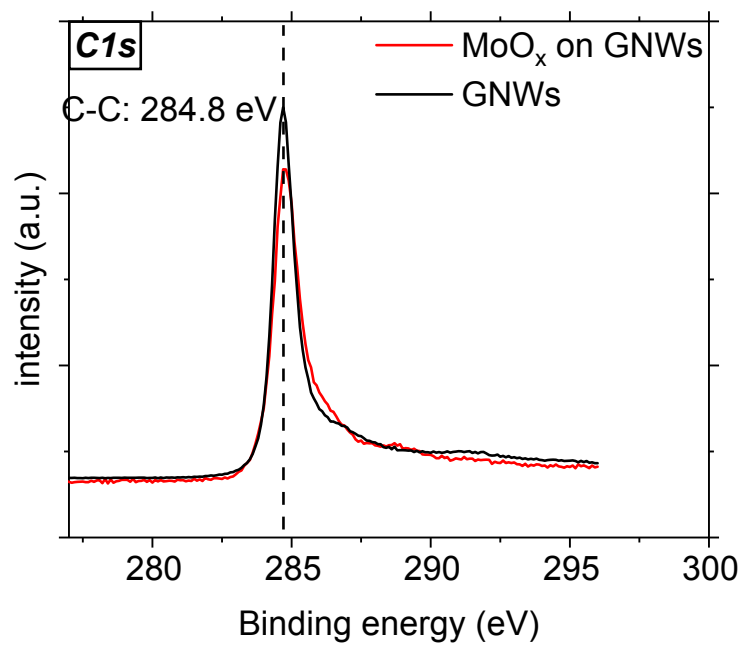

Figure S8: XPS graph of C<sub>1s</sub> peak of GNWs/ Papyex and Mo deposited on GNWs on Papyex , revealing absence of Mo-C interaction.

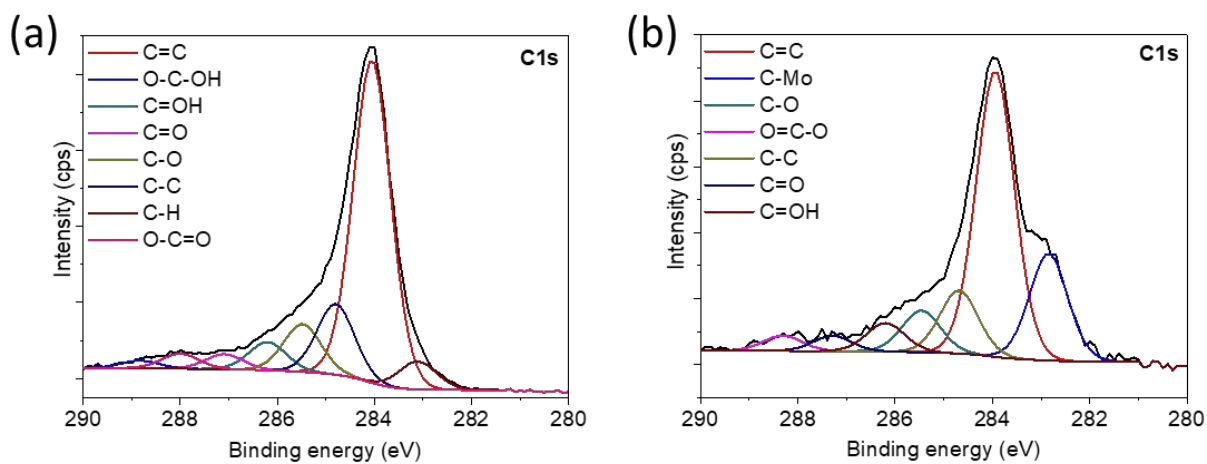

Figure S9: XPS graph of C<sub>1s</sub> peak a) before and b) after carburization.

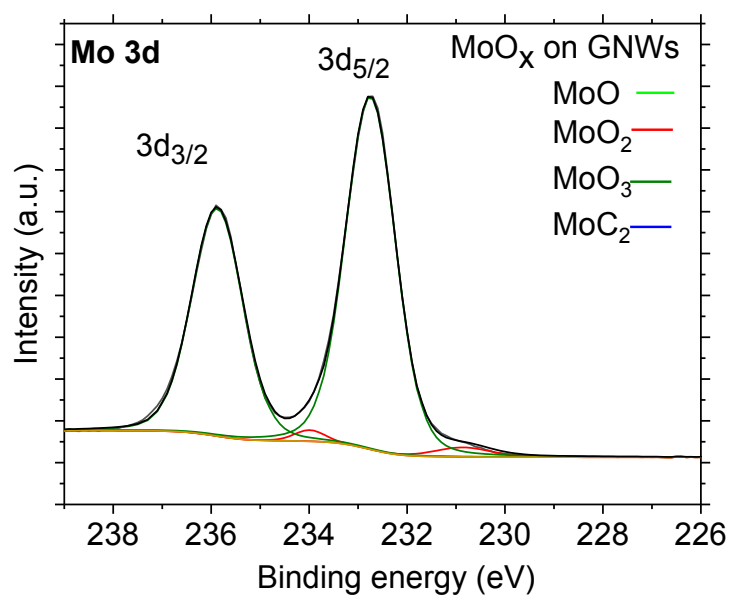

Figure S10: XPS graph of Mo3d peak before carburization.

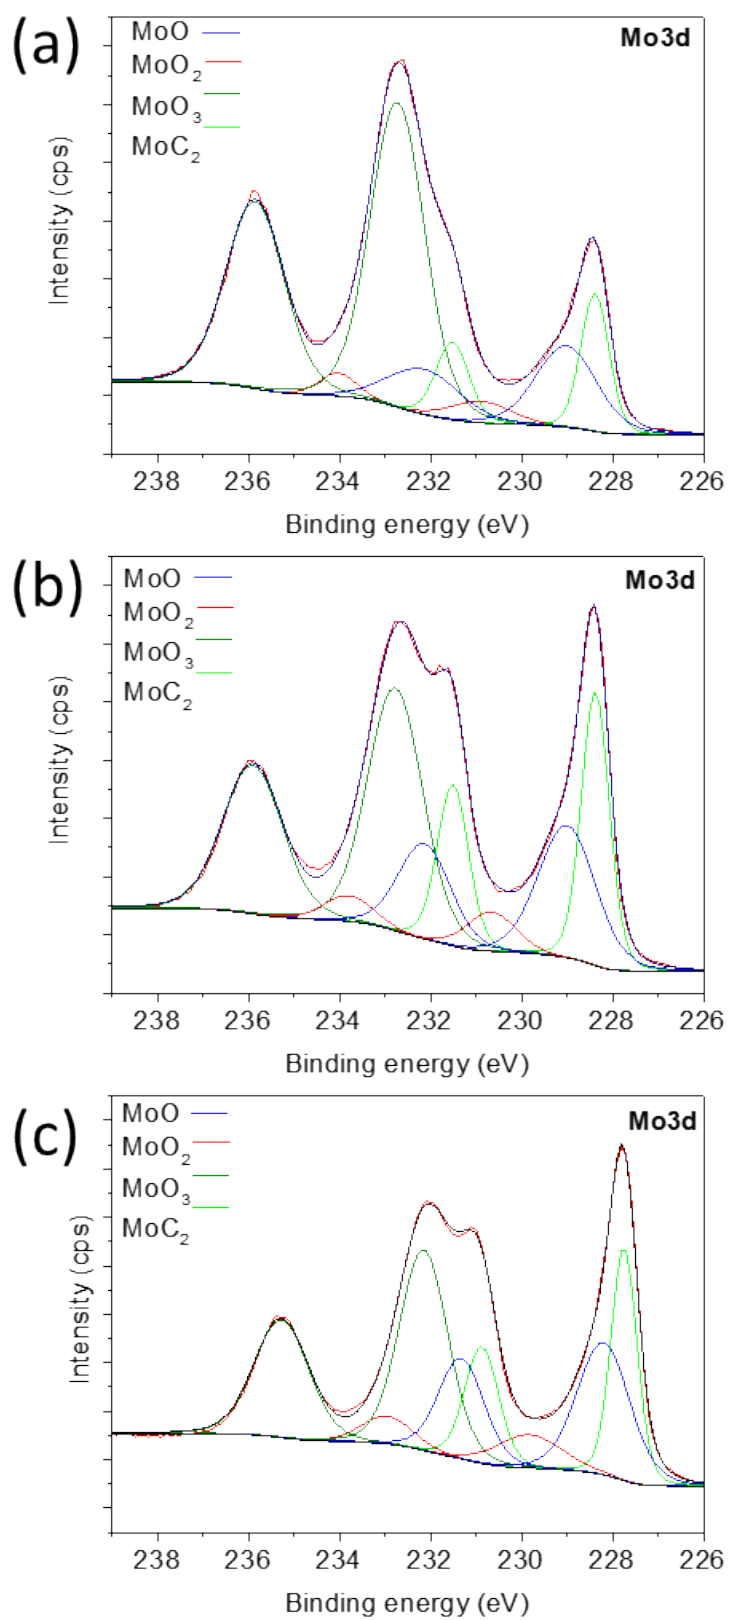

Figure S11: XPS graph of Mo<sub>3d</sub> peak after 4' (a), 8' (b) and 15' (c) of carburization duration.



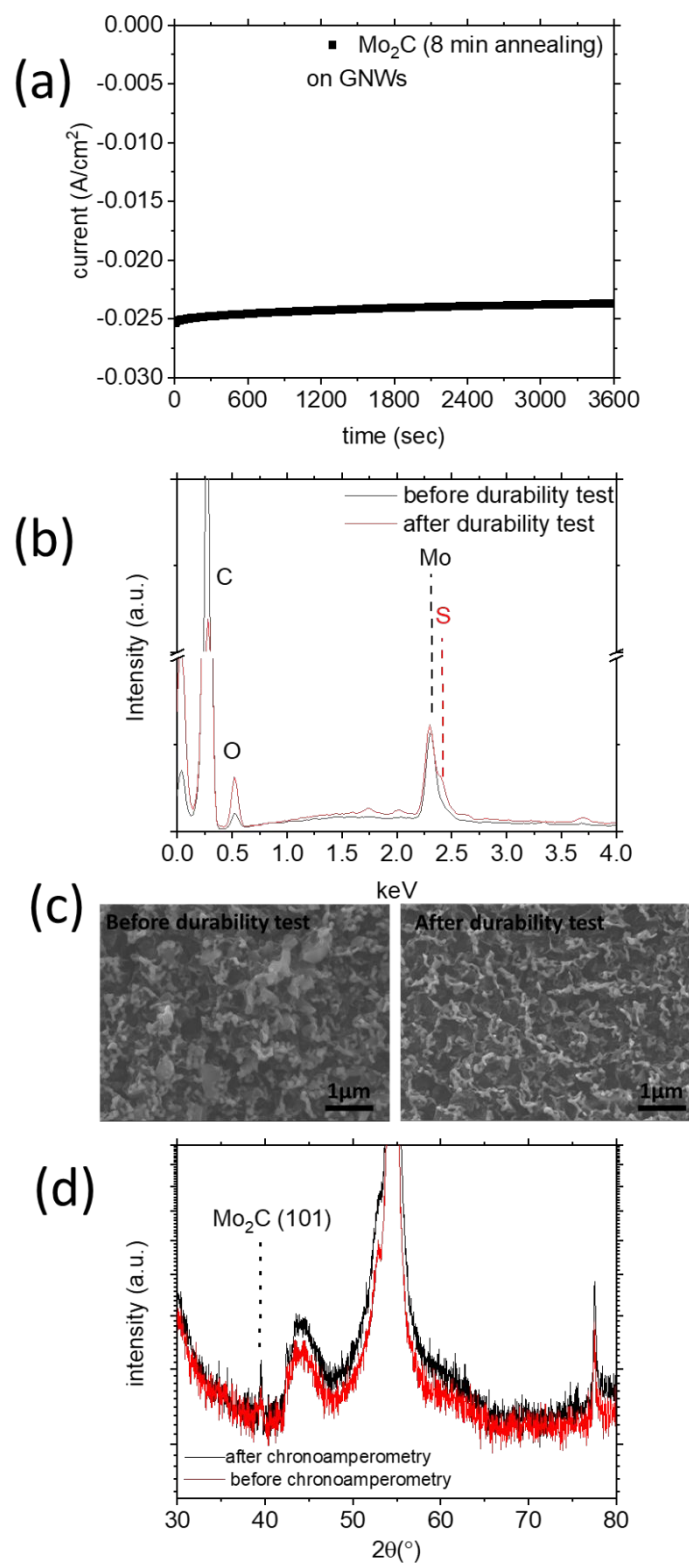

Figure S12: a) Chronoamperometry test during 1 h under 200 mV of constant bias vs RHE. b) EDS analysis, c) SEM images and d) XRD analysis, of the electrode before and after the test

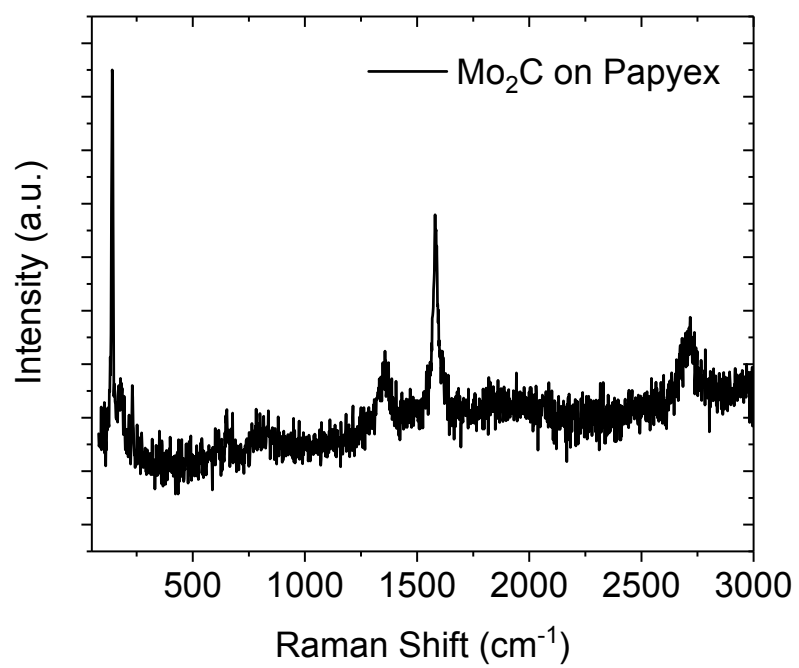

Figure S13: Raman spectrum of Mo<sub>2</sub>C on Papyex substrate.

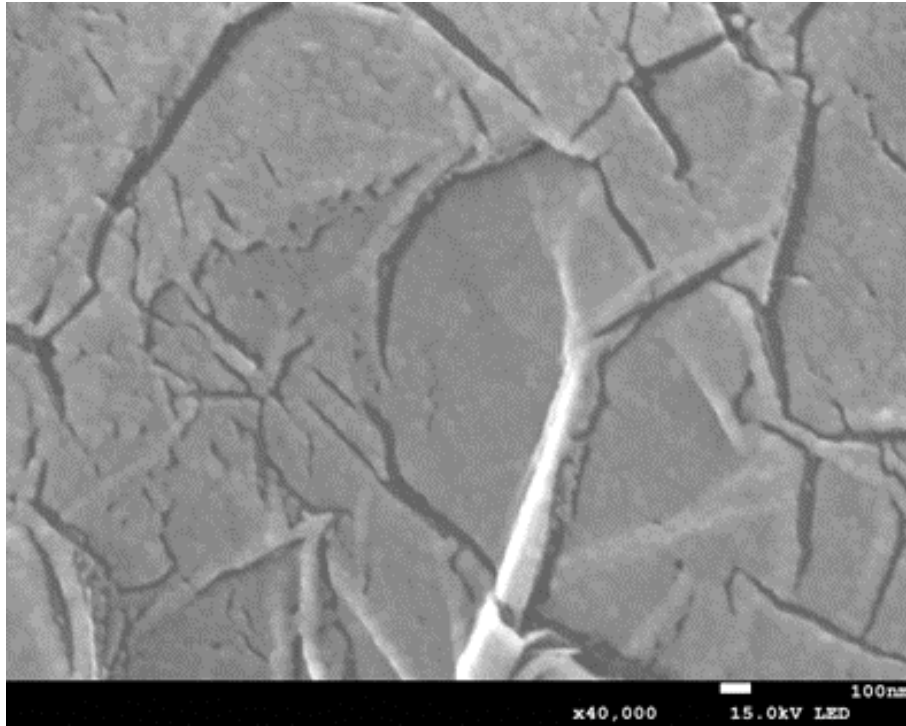

Figure S14: SEM image of a Mo<sub>2</sub>C film formed on a Papyex substrate, after carburization of sputtered Mo in a CH<sub>4</sub> atmosphere.

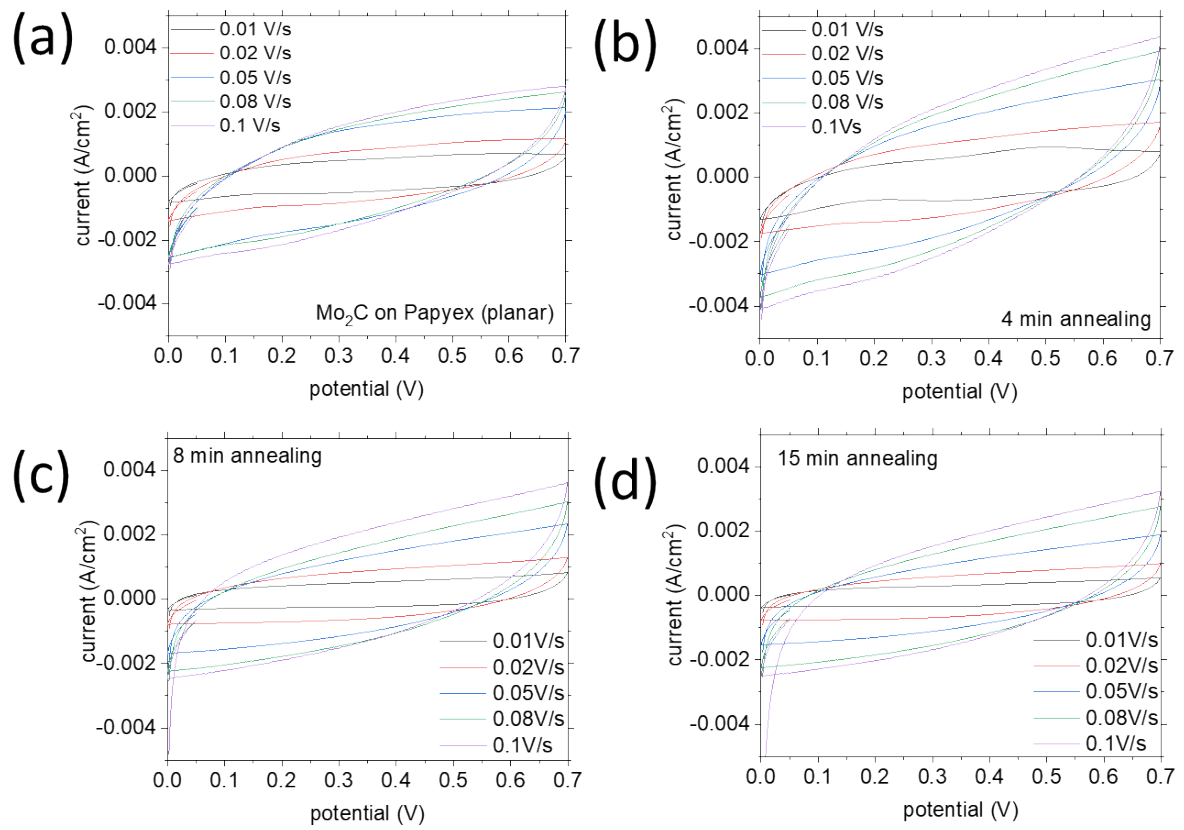

Figure S15: CV graphs of Mo carbide deposited on a) Papyex and GNWs after b) 4', c) 8' and c) 15' of annealing duration, obtained under varying scan rates

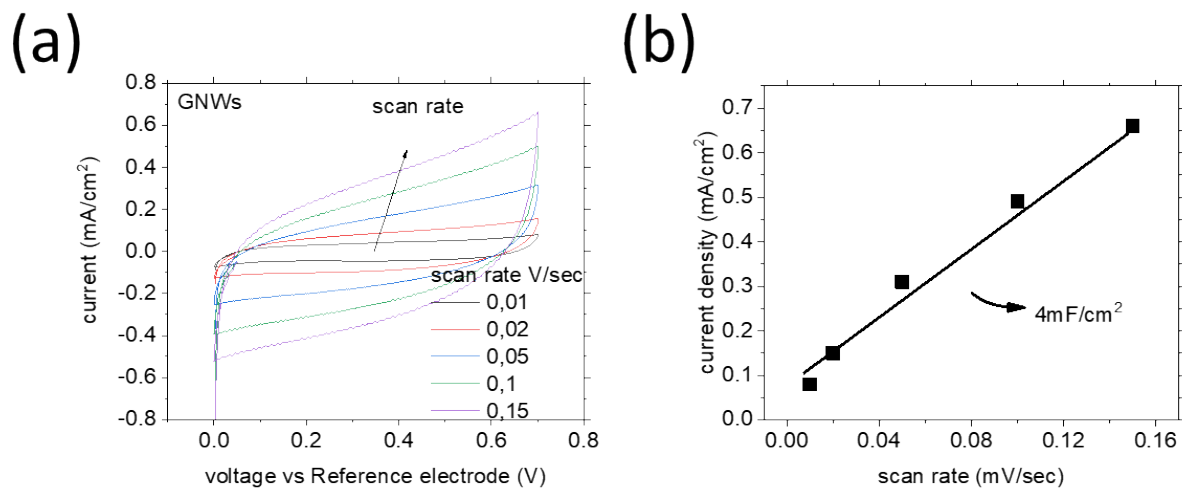

Figure S16: a) CV graphs and b) current density-scan rate plots of bare GNWs electrodes.
